# Supplementary material for: circRNA from APP Gene Changes in Alzheimer’s Disease Human Brain
Source: MDPI journal article supplement (doi:10.3390/ijms24054308), 2023-02-21
Supplement: s1 [file s1]

**Table S1.** Regression coefficients and standard errors of each multivariate linear regression model of each transcript circAPP (hsa\_circ\_0007556)(A) and APP mRNA(B).

**A) Parameter estimates**

dependent variable: log( circAPP expression)

| Parameter    | B              | Error Desv. | t      | Sig.  | Intervalo de confianza al 95% |             |
|--------------|----------------|-------------|--------|-------|-------------------------------|-------------|
|              |                |             |        |       | Lower limit                   | Upper limit |
| Intersection | -1.535         | 0.274       | -5.595 | 0.000 | -2.090                        | -0.981      |
| Control      | 0.307          | 0.132       | 2.322  | 0.025 | 0.040                         | 0.573       |
| AD           | 0 <sup>b</sup> |             |        |       |                               |             |
| Female       | 0.034          | 0.101       | 0.333  | 0.741 | -0.171                        | 0.239       |
| Male         | 0 <sup>b</sup> |             |        |       |                               |             |
| Age          | -0.001         | 0.003       | -0.234 | 0.816 | -0.007                        | 0.006       |

b. This parameter is set to zero because it is redundant.

**B) Parameter estimates**

dependent variable: log( APP mRNA expression)

| Parameter    | B              | Error Desv. | t      | Sig.  | Intervalo de confianza al 95% |             |
|--------------|----------------|-------------|--------|-------|-------------------------------|-------------|
|              |                |             |        |       | Lower limit                   | Upper limit |
| Intersection | 1.993          | 0.236       | 8.449  | 0.000 | 1.516                         | 2.469       |
| Control      | -0.028         | 0.113       | -0.247 | 0.806 | -0.257                        | 0.201       |
| AD           | 0 <sup>b</sup> |             |        |       |                               |             |
| Female       | -0.141         | 0.087       | -1.616 | 0.114 | -0.317                        | 0.035       |
| Male         | 0 <sup>b</sup> |             |        |       |                               |             |
| Age          | -0.003         | 0.003       | -1.136 | 0.263 | -0.009                        | 0.003       |

b. This parameter is set to zero because it is redundant.

**Table S2.** List of KEGG pathways significantly associated with miRNAs predicted to bind circAPP. KEGG pathways were obtained with DIANA mirpath software from the miRNAs predicted with circInteractome.

| KEGG pathway                                               | p-value  |
|------------------------------------------------------------|----------|
| Wnt signaling pathway                                      | 3.32E+05 |
| Long-term potentiation                                     | 2.86E+06 |
| Glycosaminoglycan biosynthesis - heparan sulfate / heparin | 3.38E+06 |
| Ubiquitin mediated proteolysis                             | 6.68E+06 |
| Axon guidance                                              | 7.01E+06 |
| Glutamatergic synapse                                      | 7.76E+06 |
| Hippo signaling pathway                                    | 1.29E-04 |
| Glioma                                                     | 1.42E-04 |
| Oxytocin signaling pathway                                 | 1.53E-04 |
| Signaling pathways regulating pluripotency of stem cells   | 2.26E-04 |
| Amphetamine addiction                                      | 4.17E-04 |
| Cell adhesion molecules (CAMs)                             | 1.30E-03 |
| TGF-beta signaling pathway                                 | 1.80E-03 |
| MAPK signaling pathway                                     | 1.80E-03 |
| Pathways in cancer                                         | 1.80E-03 |
| Proteoglycans in cancer                                    | 1.95E-03 |
| Oocyte meiosis                                             | 1.96E-03 |
| Thyroid hormone signaling pathway                          | 2.51E-03 |
| Melanogenesis                                              | 2.80E-03 |
| ErbB signaling pathway                                     | 3.51E-03 |
| Long-term depression                                       | 3.51E-03 |
| Gap junction                                               | 4.39E-03 |
| Adrenergic signaling in cardiomyocytes                     | 5.94E-03 |
| Protein processing in endoplasmic reticulum                | 7.96E-03 |
| Arrhythmogenic right ventricular cardiomyopathy (ARVC)     | 1.67E-02 |
| Focal adhesion                                             | 1.69E-02 |
| Melanoma                                                   | 1.69E-02 |
| Estrogen signaling pathway                                 | 1.69E-02 |
| PI3K-Akt signaling pathway                                 | 1.80E-02 |
| Rap1 signaling pathway                                     | 1.89E-02 |
| Colorectal cancer                                          | 2.37E-02 |
| Mineral absorption                                         | 3.52E-02 |
| Cholinergic synapse                                        | 3.52E-02 |
| Inflammatory mediator regulation of TRP channels           | 3.53E-02 |
| Circadian rhythm                                           | 3.73E-02 |
| Renal cell carcinoma                                       | 3.73E-02 |
| Ras signaling pathway                                      | 4.06E-02 |
| Central carbon metabolism in cancer                        | 4.25E-02 |
| mTOR signaling pathway                                     | 4.25E-02 |
| cAMP signaling pathway                                     | 4.25E-02 |
| Dopaminergic synapse                                       | 4.25E-02 |
| Regulation of actin cytoskeleton                           | 4.88E-02 |

**Table S3.** Characteristics of the samples included in the study. Nº.: Number; h: hours; PMI: Post-mortem interval.

| Nº | Braak stage | ABC score | ABC scale | % $\beta$ -amyloid plaque area | Gender | Age at death (years) | PMI (h) |
|----|-------------|-----------|-----------|--------------------------------|--------|----------------------|---------|
| 1  | III         | A1B2C1    | Low       | 0.349                          | Female | 96                   | 1.5     |
| 2  | III         | A1B2C1    | Low       | 0.044                          | Female | 88                   | 33      |
| 3  | I           | A1B1C1    | Low       | 0                              | Female | 85                   | 4.3     |
| 4  | III         | NA        | NA        | 0.672                          | Female | 69                   | 14      |
| 5  | II          | A1B1C1    | Low       | 0.147                          | Female | 66                   | 1.4     |
| 6  | III         | A1B2C3    | Int       | 0.648                          | Female | 84                   | 13      |
| 7  | IV          | A2B2C2    | Int       | 0.814                          | Female | 97                   | NA      |
| 8  | IV          | A2B2C3    | Int       | 0.42                           | Male   | 78                   | 5       |
| 9  | IV          | A2B2C2    | Int       | 1.33                           | Male   | 84                   | 3.3     |
| 10 | I           | A1B1C1    | Low       | 0                              | Male   | 60                   | 15.3    |
| 11 | V           | A3B3C2    | High      | NA                             | Male   | 91                   | 5       |
| 12 | III         | A3B2C3    | Int       | 0.724                          | Male   | 83                   | 9       |
| 13 | IV          | A3B2C1    | Int       | 0.131                          | Female | 90                   | 3       |
| 14 | I           | A1B1C1    | Low       | 0.024                          | Male   | 85                   | 3.2     |
| 15 | III         | A3B2C3    | Int       | 0.376                          | Female | 85                   | NA      |
| 16 | III-IV      | A3B2C3    | Int       | 0.357                          | Female | 98                   | 3       |
| 17 | IV          | A2B2C2    | Int       | 0.431                          | Female | 91                   | 10      |
| 18 | III         | A2B2C3    | Int       | 0.528                          | Female | 98                   | 23      |
| 19 | V           | A3B3C3    | High      | 1.142                          | Female | 77                   | 11      |
| 20 | VI          | A3B3C3    | High      | 0.777                          | Female | 86                   | 2.3     |
| 21 | V           | A3B3C2    | High      | 1.61                           | Female | 82                   | 9       |
| 22 | I           | A1B1C1    | Low       | NA                             | Female | 85                   | 2       |
| 23 | IV          | A2B2C2    | Int       | 0.959                          | Male   | 88                   | 3.5     |
| 24 | VI          | A3B3C3    | High      | 2.013                          | Male   | 70                   | 2.35    |
| 25 | VI          | A3B3C3    | High      | 1.545                          | Male   | 59                   | 4       |
| 26 | II          | A2B1C3    | Low       | NA                             | Male   | 80                   | 3       |
| 27 | II          | A1B1C1    | Low       | NA                             | Male   | 74                   | 2.5     |
| 28 | II          | A1B2C2    | Int       | NA                             | Female | 71                   | 4       |
| 29 | II          | A2B1C1    | Low       | NA                             | Female | 80                   | 3.7     |
| 30 | 0           | control   | Not       | NA                             | Female | 43                   | 3       |
| 31 | 0           | control   | Not       | NA                             | Male   | 54                   | 18      |
| 32 | 0           | control   | Not       | NA                             | Female | 19                   | NA      |
| 33 | 0           | control   | Not       | NA                             | Female | 46                   | 7       |
| 34 | 0           | control   | Not       | NA                             | Male   | 28                   | 6       |
| 35 | 0           | control   | Not       | NA                             | Male   | 41                   | 3.5     |
| 36 | 0           | control   | Not       | NA                             | Male   | 54                   | 2.7     |
| 37 | 0           | control   | Not       | NA                             | Male   | 81                   | 10.5    |
| 38 | 0           | control   | Not       | NA                             | Male   | 26                   | 6.2     |
| 39 | 0           | control   | Not       | NA                             | Male   | 53                   | 7       |
| 40 | 0           | control   | Not       | NA                             | Female | 88                   | 9       |
| 41 | 0           | control   | Not       | NA                             | Male   | 66                   | 6.5     |
| 42 | 0           | control   | Not       | NA                             | Female | 88                   | 3.5     |
| 43 | 0           | control   | Not       | NA                             | Female | 76                   | 11.5    |
| 44 | 0           | control   | Not       | NA                             | Male   | 65                   | 3       |
| 45 | 0           | control   | Not       | NA                             | Male   | 83                   | NA      |

**Table S4.** It shows the sequences of the primers used in the different PCRs carried out in this work.

|                | Forward 5'→3'         | Reverse 5'→3'          |
|----------------|-----------------------|------------------------|
| <b>circAPP</b> | CGGTGTTGTCATAGCGACAG  | GGCCAAGACGTCATCTGAAT   |
| <b>APP</b>     | CAGCCAACACAGAAAACGAAG | TGAGTCATGTCGGAATTCTGC  |
| <b>ACTB</b>    | GGACTTCGAGCAAGAGATGG  | AGCACTGTGTTGGCGTACAG   |
| <b>GAPDH</b>   | ACATCGCTCAGACACCATG   | TGTAGTTGAGGTCAATGAAGGG |
