# Supplementary material for: circRNA from APP Gene Changes in Alzheimer’s Disease Human Brain
Source: MDPI journal article supplement (doi:10.3390/ijms24054308), 2023-02-21
Supplement: s1 [file s1]

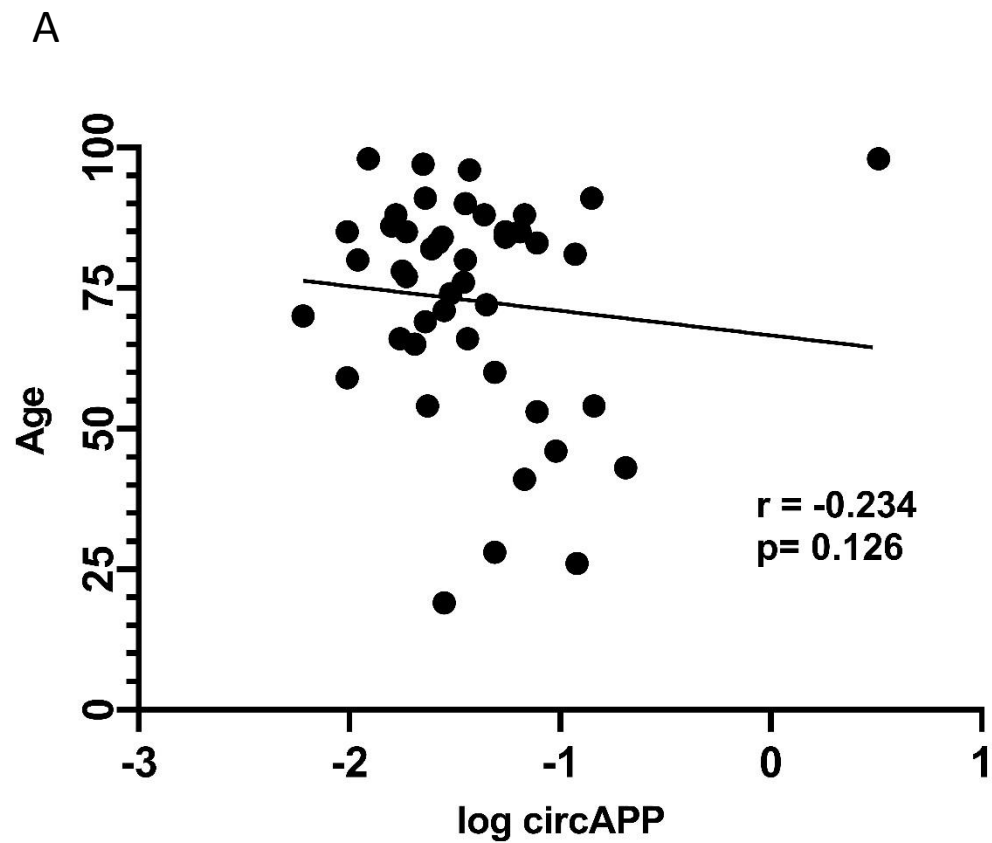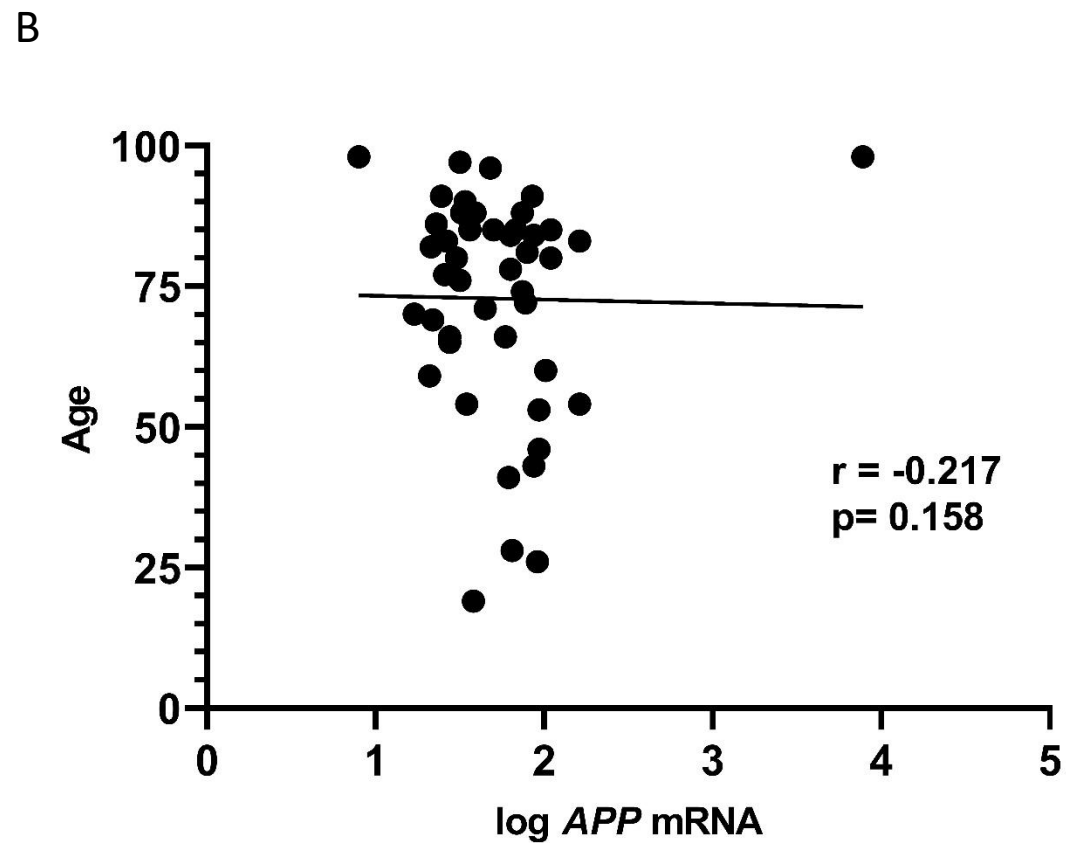

**Figure S1.** *APP* RNA variants and Age correlation. Dispersion diagram showing no correlation between Age and circAPP (hsa\_circ\_0007556) and *APP* mRNA expression levels.

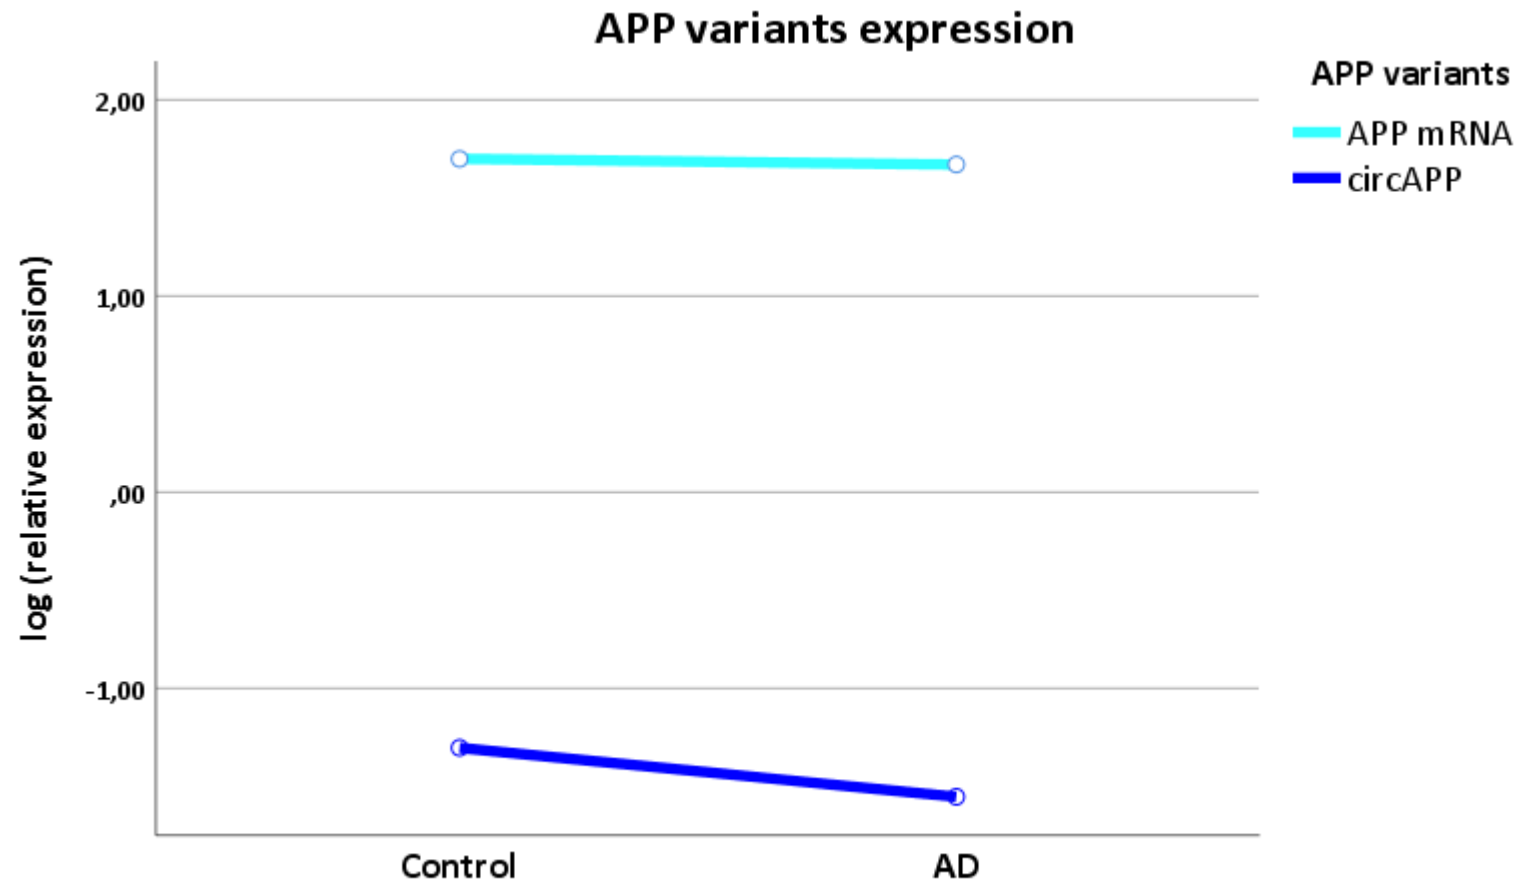

**Figure S2.** Representation of the proportional expression between controls and AD cases of the log(relative expression) of the two *APP* variants

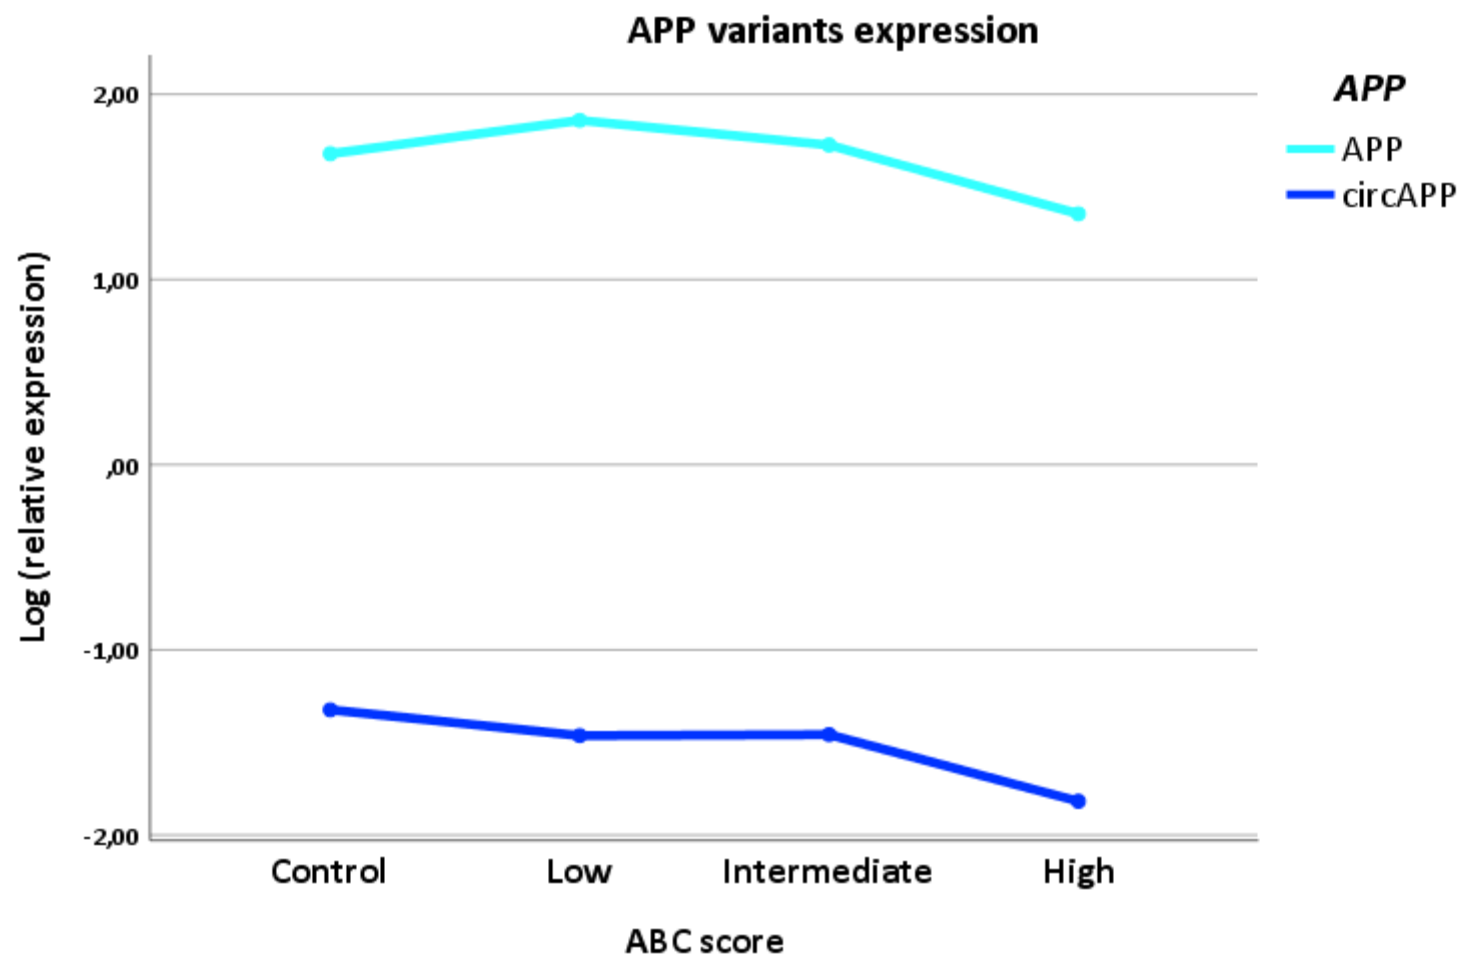

**Figure S3.** Representation of the proportional expression between controls and AD neuropathological stages, according to the ABC score of the log(relative expression) of the two *APP* variants

A

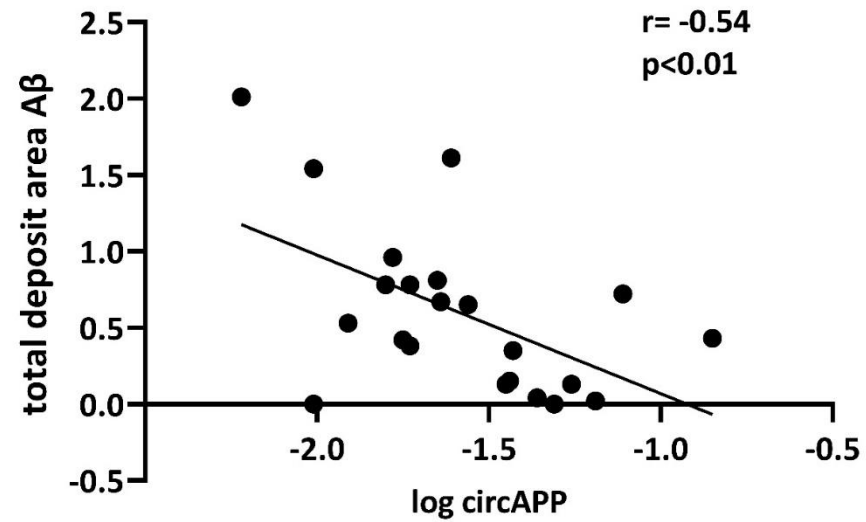

B

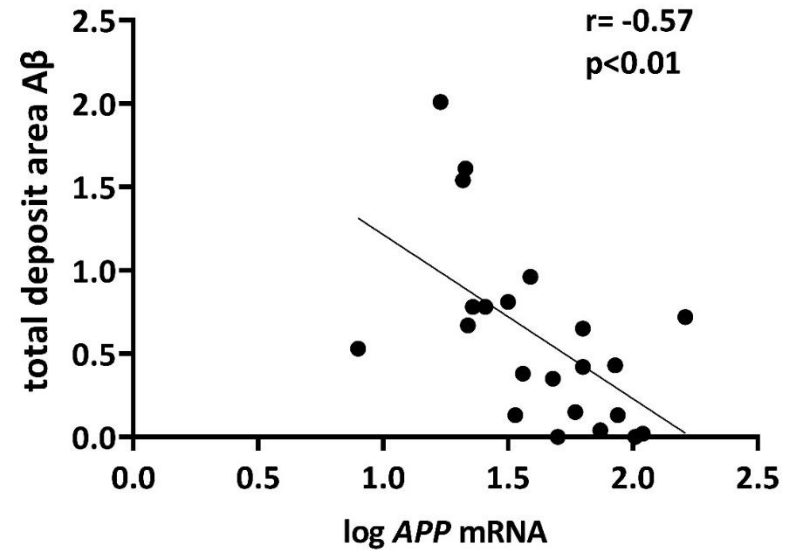

**Figure S4.** *APP* RNA variants and Aβ deposits correlation. Dispersion diagram showing negative correlation between global average area of Aβ deposits and circAPP (hsa\_circ\_0007556) and *APP* mRNA expression levels.

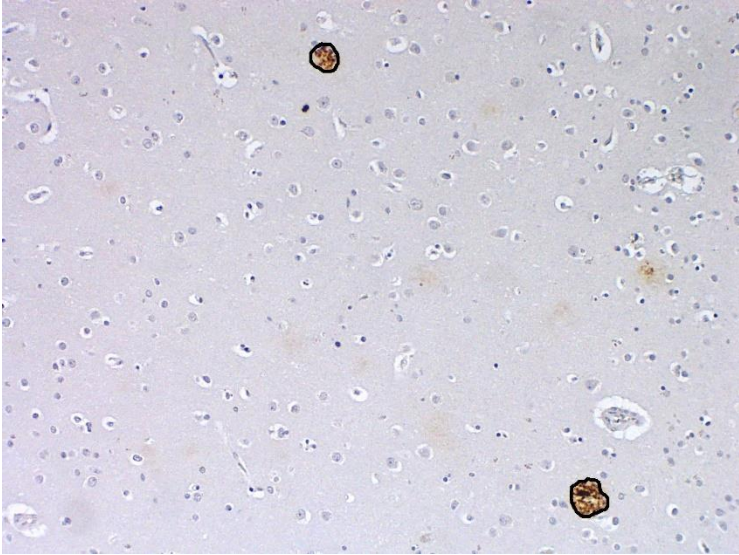

Low

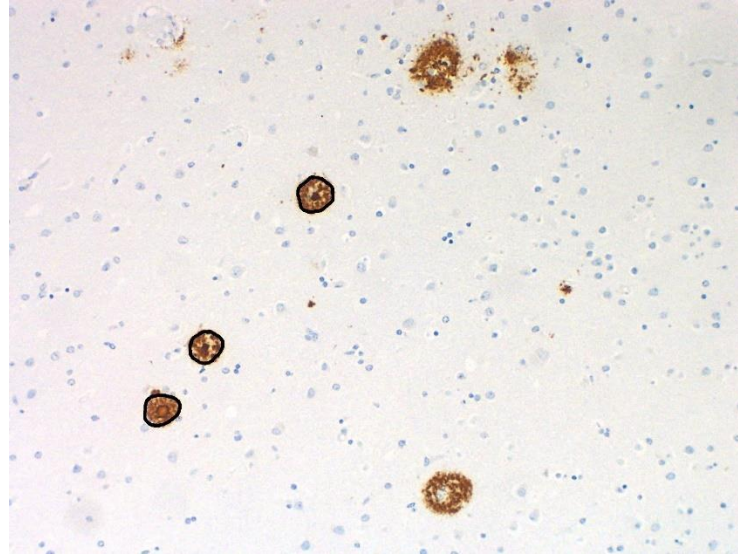

Intermediate

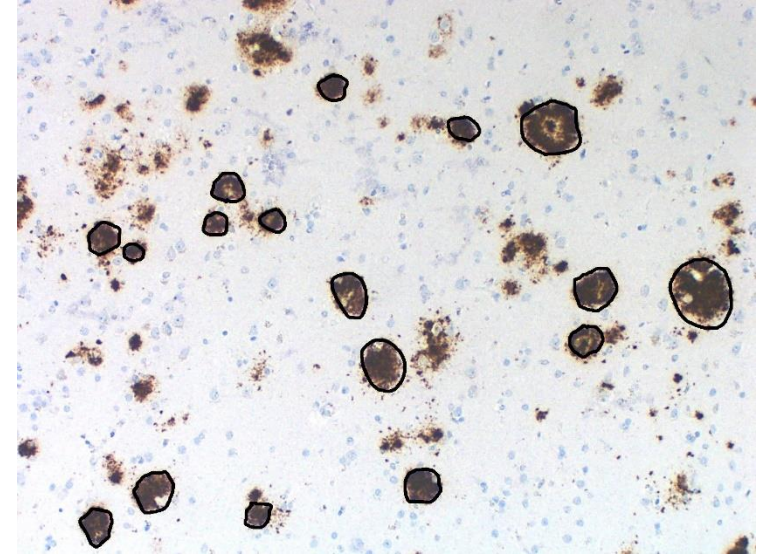

High

ABC score

**Figure S5.** Quantitative assessment of A $\beta$  deposits. The images show sections of the entorhinal cortex after immunostaining with a mouse monoclonal anti- A $\beta$  antibody. A $\beta$  plaques are surrounded by a black line. The area enclosed by the black line represents the area of the A $\beta$  plaque measured with the ImagenJ software.
